# Supplementary material for: Single serine on TSC2 exerts biased control over mTORC1 activation mediated by ERK1/2 but not Akt
Source: Life Sci Alliance. 2022 Mar 14;5(6):e202101169. doi: 10.26508/lsa.202101169 (PMC8921838; doi:10.26508/lsa.202101169)
Supplement: Supplementary file 8 [file LSA-2021-01169_SdataF4.2.xlsx]

## Sheet: Figure 4A
p/t p70S6K			Control	Ins	Ins+ERKI (SCH772984)	Ins+AKTI (MK-2206)
S389			0.572812	1.70942	1.30281	0.722642
			0.927697	2.13389	2.41422	1.41435
			1.1971	1.93233	2.31546	1.30932
			1.23944	2.67251	1.91036	0.798613
			1.26609	1.8437	2.10773	0.521495
			0.797043	1.59587	1.81004	0.945134
p/t ERK1/2			1.24349	1.59931	1.44346	1.67673
T202/Y204			1.12109	1.36709	1.41403	1.79149
			0.9923	1.0704	1.02618	1.3682
			0.899931	1.57981	1.17251	1.25442
			0.807776	1.68799	1.34859	1.25894
			0.935597	1.54464	1.29282	1.98351
p/t Akt			1.4898	2.06598	2.41337	1.50716
T308			1.11364	1.97406	2.52737	1.01455
			0.744753	1.99726	2.03455	1.4364
			0.769853	2.13754	2.03603	1.36701
			0.970581	1.79132	1.97602	1.31488
			0.912247	2.17778	2.27454	1.24494

## Sheet: Figure 4B
			Vehicle					Insulin
			KO	WT	SE	SA		KO+Ins	WT+Ins	SE+Ins	SA+Ins
p/t p70S6K			1.71321	1.11123	0.888558	0.995388		1.73469	1.39937	1.56074	1.97593
			1.54517	0.957179	0.857327	1.19448		1.80352	1.31383	1.60176	1.67459
			1.7753	0.93159	0.91696	0.810133		1.89655	1.52577	1.70785	1.97225
			1.3569	0.982783	0.785614	0.995708		1.46698	1.48657	1.42608	2.16593
			1.1807	0.992541	0.783697	0.928283		1.48152	1.39123	1.26788	1.91755
			1.36661	1.02468	0.812767	1.07601		1.45774	1.35314	1.2711	2.25393
			1.58605	0.956645	1.1352	1.04692		1.70963	1.80969	1.67406	2.4607
			1.6013	1.05711	0.945547	0.943746		1.7028	1.7895	1.69969	2.30127
			1.61565	0.986243	1.04488	1.00933		1.79814	1.7003	1.88116	3.04486
			1.44223	1.01341	1.30706	1.00099		1.60042	1.43077	1.74278	1.84073
			1.30429	0.931535	1.18607	1.01928		1.67127	1.37051	1.59129	2.03419
			1.2847	1.05506	1.21867	0.97973		1.83812	1.47725	1.65169	2.07666
Log(10) transformed			0.00117833	0.00429378	0.0145674	0.124637		0.568793	1.22348	1.84237	1.41475
p/t Akt (T308)			-0.117	0.0657566	-0.0382519	0.00750539		0.409286	1.12947	1.88084	1.40717
			-0.206056	-0.0827096	0.0212718	-0.18698		0.367526	1.10308	1.87877	1.37014
			-0.334097	-0.0684727	-0.0556736	-0.0292769		0.944998	1.37279	1.52683	1.34666
			0.000447085	0.00281492	0.0636635	-0.0851625		0.914015	1.41011	1.52382	1.36614
			-0.120767	0.0566613	-0.0166279	0.0945603		0.844012	1.35282	1.46472	1.30927
			-0.334097	-0.0684727	-0.0556736	-0.0292769		0.944998	1.37279	1.52683	1.34666
			0.000447085	0.00281492	0.0636635	-0.0851625		0.914015	1.41011	1.52382	1.36614
			-0.120767	0.0566613	-0.0166279	0.0945603		0.844012	1.35282	1.46472	1.30927
			-0.123466	-0.394166	0.132969	-0.144655		1.21238	1.98461	2.37567	2.27938
			0.125857	0.046488	-0.0839408	0.00140679		1.16974	1.95177	2.30964	2.26443
			-0.0629299	0.171296	-0.0874939	0.107224		1.1487	1.97158	2.34907	2.26778

## Sheet: Figure 4C
		Vehicle	Insulin	Insulin + Rapamycin	Insulin + Torkinib
p/t p70S6K		1.03297	3.99608	0	0
		0.884025	5.63327	0	0
		1.083	5.20821	0	0
		0.952299	6.6905	0	0.0102739
		1.16175	6.60023	0.00410758	0
		0.885952	5.37383	0	0

## Sheet: Figure 4D
		WT con	SE con	SA con		WT PDGF	SE PDGF	SA PDGF
p/t p70S6K
		0.987004	1.14758	0.989273		1.48623	1.55818	1.35061
		1.00289	1.10808	1.11591		1.54639	1.40107	1.30465
		1.01011	1.19696	1.16339		1.47328	1.34989	1.44046
		1.0268	0.971888	0.996598		1.53212	1.73139	1.73205
		1.01185	1.09187	1.02193		1.58142	1.6642	1.8583
		0.961351	0.970343	1.09889		1.79268	1.75782	1.82032
p/t Akt		0.989142	0.8634	0.975925		6.21148	5.76809	5.55252
		0.929642	0.924582	0.811914		6.58377	6.02607	5.96477
		1.08122	0.947515	0.920907		6.96494	5.88593	6.66157
		0.914018	1.07998	0.897462		6.89524	6.36045	7.05274
		0.872895	0.925128	0.978158		6.3966	6.25532	6.87642
		1.21309	1.108	1.13077		6.39679	7.56049	8.79528
