# Supplementary material for: Single serine on TSC2 exerts biased control over mTORC1 activation mediated by ERK1/2 but not Akt
Source: Life Sci Alliance. 2022 Mar 14;5(6):e202101169. doi: 10.26508/lsa.202101169 (PMC8921838; doi:10.26508/lsa.202101169)
Supplement: Supplementary file 10 [file LSA-2021-01169_SdataF5.2.xlsx]

## Sheet: Figure 5A
p-S6K/total protein	WT Baseline	SE Baseline	SA Baseline	WT Simulated Ischemia	SE Simulated Ischemia	SA Simulated Ischemia
	0.945092	1.11293	1.43079	0.0353528	0.0352845	0.019277
	1.05491	1.25163	1.36613	0.0323539	0.0316038	0.027874
	1.14987	1.04622	1.1087	0.0328696	0.0331854	0.0214507
	0.850127	1.11564	1.21344	0.0334162	0.0277015	0.0207638

## Sheet: Figure 5B
p/t p70S6K		WT Fed	SE Fed	SA Fed	WT 1 hr starve	SE 1 hr starve	SA 1 hr starve
		0.991842	0.856854	1.13738	0.321262	0.321014	0.442337
		1.11638	0.913697	1.09852	0.379408	0.344126	0.440533
		0.891773	0.94696	1.15731	0.354198	0.288723	0.37736
					0.315196	0.278622	0.367637
		0.978241	1.12928	1.41582	0.575243	0.487003	0.589191
		1.03585	1.11201	1.28399	0.582073	0.581123	0.604903
		0.985913	1.08746	1.23758	0.59168	0.503942	0.681941

## Sheet: Figure 5C
P/T P70S6K
	WT 1 hr starve	SE 1 hr starve	SA 1 hr starve	WT fed	SE fed	SA fed
	1.07383	0.783177	0.944859	1.95069	1.90237	1.74277
	1.05791	0.776829	0.762995	1.90207	1.89078	1.65137
	0.868256	0.834764	0.839065	1.91403	2.03838	1.74686
	1.12671	0.956986	1.09245	2.51618	2.95002	2.93821
	0.999989	1.00212	1.08593	2.86392	3.12499	2.66582
	0.873306	0.963583	1.12114	2.86147	2.91053	2.15205
