# Supplementary material for: Single serine on TSC2 exerts biased control over mTORC1 activation mediated by ERK1/2 but not Akt
Source: Life Sci Alliance. 2022 Mar 14;5(6):e202101169. doi: 10.26508/lsa.202101169 (PMC8921838; doi:10.26508/lsa.202101169)
Supplement: Supplementary file 11 [file LSA-2021-01169_SdataF6.xlsx]

## Sheet: Figure 6A
Body Weight in grams
	WT-TSC2															S1365E TSC2																S1365A TSC2
B	26.4	27.3	22.9	24	25.4	26.1	23.8	23.5	21.8	29	26	26	30	27		25.9	26.6	24.7	28	26.4	23.5	24.5	24.5	24.5	26.6	26	22.8	25.8	23.1			26.6	29.7	29.5	27.5	26.2	28.7	26	26
2	33.3	34.4	28.3	27.3	29	34.5	29.2	27.3	25.1	29	30	30	33	31		32.7	30	31	30.2	30.7	28.6	30	30	32.8	33.5	30.8	26.7	31.8	28.3			34.5	34.6	33.8	33.6	32.8	36.9	27	29
4	41.3	39.4	28.3	29.3	33.4	39.6	32.7	27.9	29.5	32	36	34	36	35		37	33	34.8	29.9	33.8	31.6	34.5	34	38.2	33	30.4	26.9	37.4	31.1			36.7	38.5	36	37.5	36.2	44.5	33	32
6	36.9	37.3	37	32.7	39.4	46.3	37.3	33.6	33.3	39	41	37	40	41		39.6	34.9	39.2	34.9	39.7	37.6	40.2	39.9	44.8	41.7	35.3	30	44	35			42.3	39.4	38.4	42.2	39.4	50	38	41
8	42	42	38	35	42	49	39	31	34	43	48	41	44	48		33	37	41	34	41	38	40	41	47	43	37	32	47	39			47	41	40	46	44	51	42	48
10	51	50	45	41	47	51	44	35	42	46	49	43	46	50		29	44	49	39	46	46	47	47	52	50	42	34	49	43			49	42	46	45	45	52	45	49
12	52	51	46	44	47	51	45	40	45	47	50	46	49	50		38	47	52	39	48	50	49	49	52	51	43	37	50	47			49	48	51	51	50	53	51	46
14	52.2	50	48.5	43.5	46.9	49	44.9	42.4	43.5	49	51	49	49	51		41.5	48	51.5	40.8	48.2	49.9	48	48.3	51	52	44.4	36.6	47.6	48.3			47.8	47.4	48.9	47	49	51	52	52
18	53	51	50	44	48	52	45	46	48	49	52	51	50	52		49	51	52	47	48	50	50	50	53	53	51	40	51	52			49	49	47	51	48	53	50	52
Controls
18	30	32	30													35	33	33	31	31												35	33	30

## Sheet: Figure 5B
Fasting Blood Glucose		mg/dl
		WT														S1365E																S1365A
	Control	176.5	149.5	140.5												140.5	135.5	182	117	168												137	134	111
	HFD	193.5	181	201.5	197.5	197.5	201	228.5	194	237	208.5	204.5	201.5	270		213	214	156	220.5	210	190	205.5	187	190	227	197	165	188	227			193	199.5	194	140.5	175	172	214	200.5

## Sheet: Figure 5C
	Plasma	Glucose mg/dl
	time(min)	WT														S1365E															S1365A
	0	193.5	181	201.5	197.5	197.5	201	228.5	194	237	208.5	204.5	201.5	270		213	214	156	220.5	210	190	205.5	187	190	227	197	165	188	227		193	199.5	194	140.5	175	172	214	200.5
	15	292	346.5	385	304	251	339	349	320	469	455	361	349	445.667		300.5	435	291.5	275.5	424	395	345	430	353	404.5	393	324	361.5	350.5		350.5	346	334.5	341	333	289	452	395
	30	300.5	338	387	323.5	342.5	432	381.5	370.5	466.5	407	328	387.5	470		276.5	443.5	247	263.5	401	361	322.5	441.5	341.5	384	465.5	367	411	423.5		403	353.5	377	315.5	390.5	262.5	461	447
	60	323	291.5	336	265.5	301	349.5	319.5	319	320.5	329.5	266	461.5	461.5		352	366.5	180	314.5	310	298.5	238.5	349	285	239	341	258.5	286.5	294		373.5	309.5	348.5	203	315	224	389	461
	120	233	227.5	198.5	187	192	222.5	206	164	256	316	228	256.5	348		261	257.5	141.333	245	209.5	229	213	208.5	166.5	176	197.5	158.5	188.5	205		218.5	221.5	274.5	131	233	160.5	348	268
